# Supplementary material for: Synthesis of tri-level hierarchical SAPO-34 zeolite with intracrystalline micro–meso–macroporosity showing superior MTO performance
Source: Royal Society of Chemistry journal article supplement (doi:10.1039/c5ta04642d), 2015-01-01
Supplement: c5ta04642d1.pdf [file c5ta04642d1.pdf]

## Supporting Information

### **Synthesis of tri-level hierarchical SAPO-34 zeolite with intracrystalline micro-meso-macroporosity showing superior MTO performance**

**Qiming Sun,<sup>a,†</sup> Wang Ning,<sup>a,†</sup> Guanqi Guo,<sup>a</sup> Xiaoxin Chen,<sup>a</sup> and Jihong Yu<sup>\*a</sup>**

<sup>a</sup> State Key Laboratory of Inorganic Synthesis and Preparative Chemistry, College of Chemistry, Jilin University, Changchun 130012, P. R. China

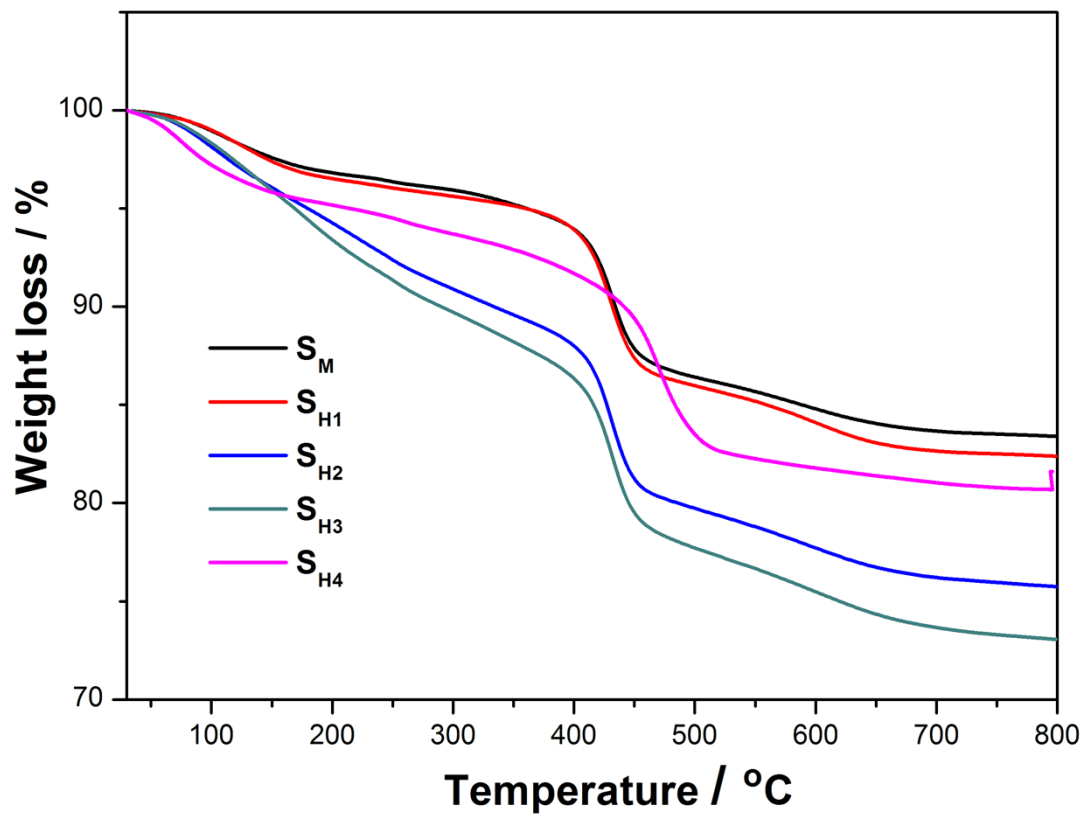

**Figure S1** The TG curves of conventional microporous SAPO-34 ( $S_M$ ) and hierarchically porous SAPO-34 ( $S_{H1}$ ,  $S_{H2}$ ,  $S_{H3}$ , and  $S_{H4}$ ) catalysts.

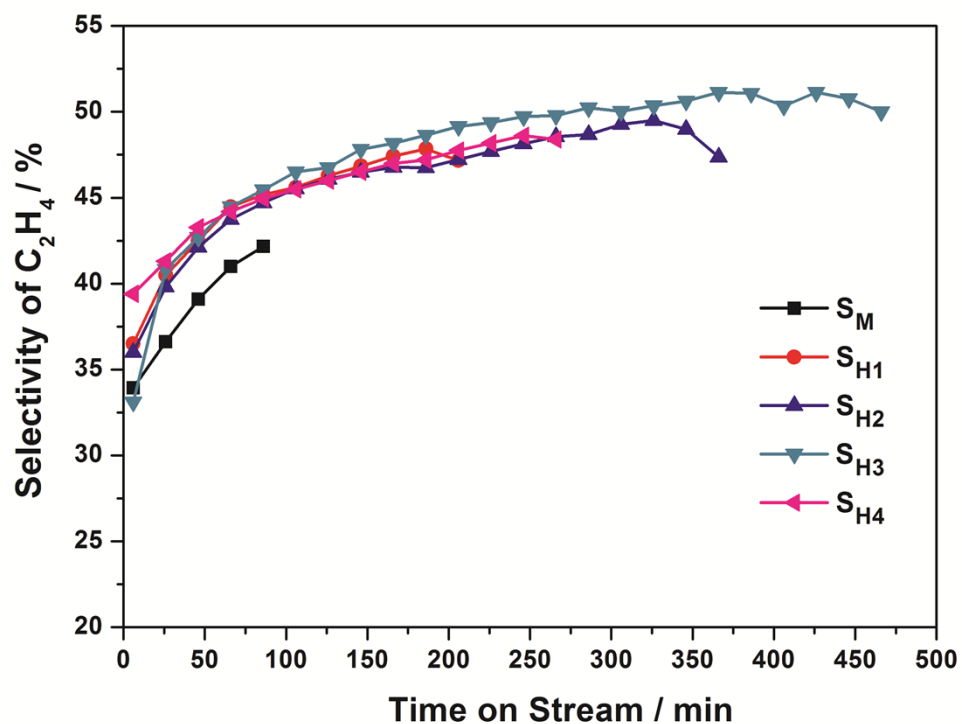

**Figure S2** Selectivity of ethylene versus time-on-stream over conventional microporous SAPO-34 ( $S_M$ ) and hierarchically porous SAPO-34 ( $S_{H1}$ ,  $S_{H2}$ ,  $S_{H3}$ , and  $S_{H4}$ ) catalysts in MTO reaction. Experimental conditions: WHSV = 4 h<sup>-1</sup>, T = 723 K, catalyst weight = 300 mg.

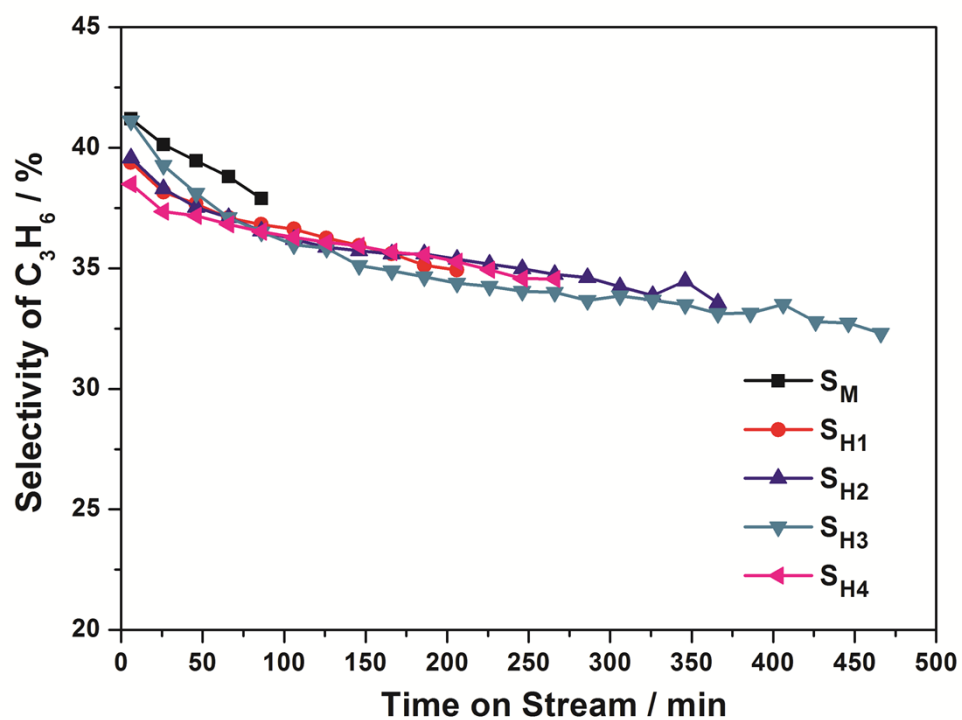

**Figure S3** Selectivity of propylene versus time-on-stream over conventional microporous SAPO-34 ( $S_M$ ) and hierarchically porous SAPO-34 ( $S_{H1}$ ,  $S_{H2}$ ,  $S_{H3}$ , and  $S_{H4}$ ) catalysts in MTO reaction. Experimental conditions: WHSV = 4 h<sup>-1</sup>, T = 723 K, catalyst weight = 300 mg.

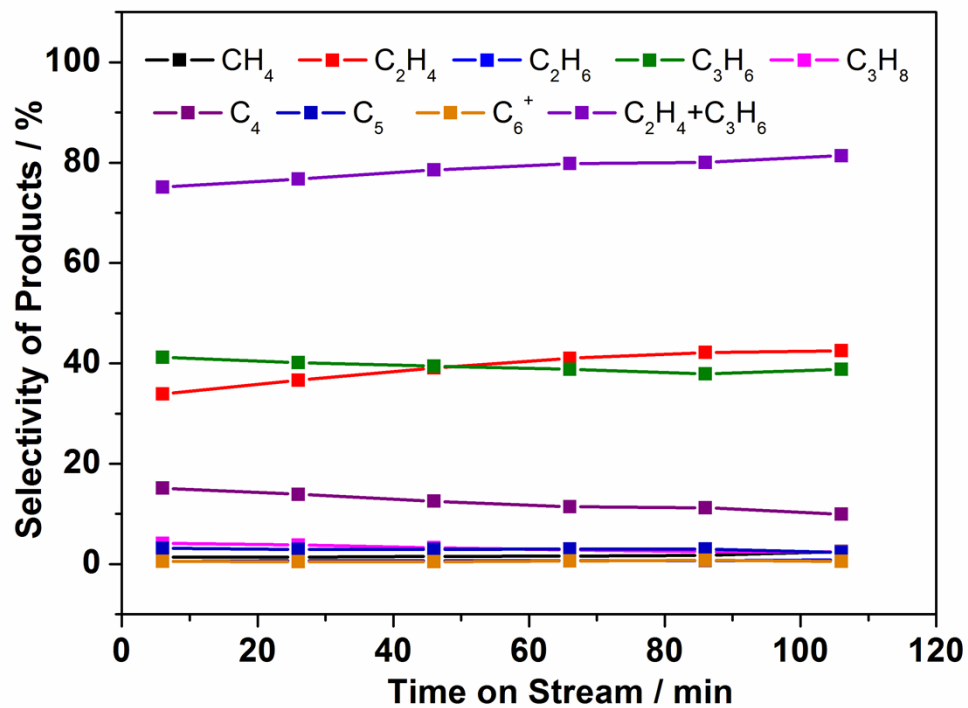

**Figure S4** Products distribution of conventional microporous SAPO-34 catalyst ( $S_M$ ) in MTO reaction. Experimental conditions: WHSV = 4 h<sup>-1</sup>, T = 723 K, catalyst weight = 300 mg.

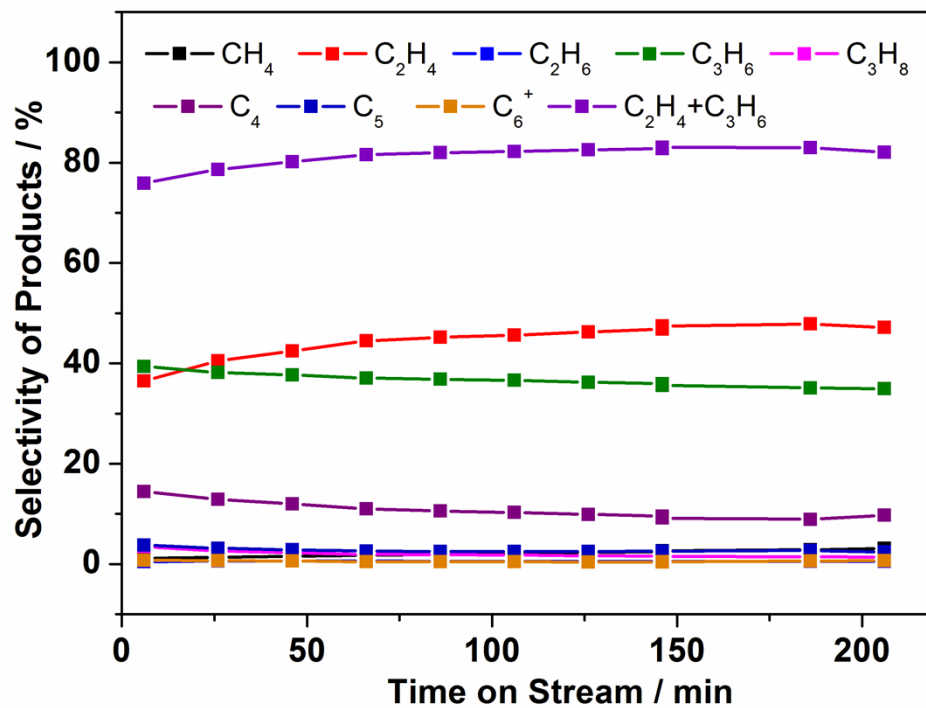

**Figure S5** Products distribution of hierarchically porous SAPO-34 catalyst ( $S_{H1}$ ) in MTO reaction. Experimental conditions: WHSV = 4 h<sup>-1</sup>, T = 723 K, catalyst weight = 300 mg.

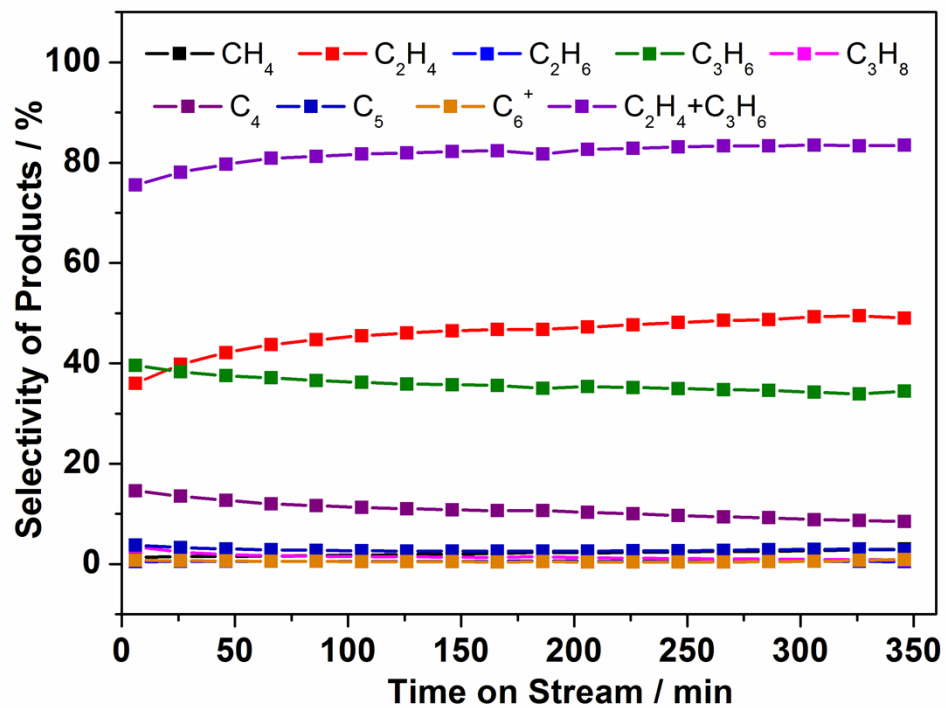

**Figure S6** Products distribution of hierarchically porous SAPO-34 catalyst ( $S_{H_2}$ ) in MTO reaction. Experimental conditions: WHSV = 4 h<sup>-1</sup>, T = 723 K, catalyst weight = 300 mg.

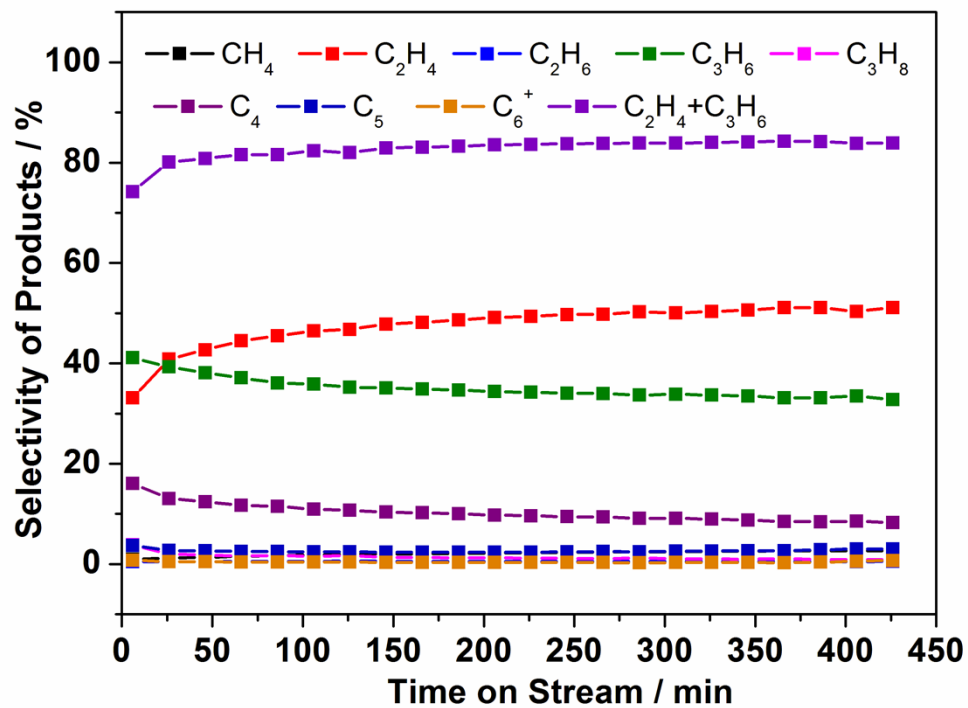

**Figure S7** Products distribution of hierarchically porous SAPO-34 catalyst ( $S_{H3}$ ) in MTO reaction. Experimental conditions: WHSV = 4 h<sup>-1</sup>, T = 723 K, catalyst weight = 300 mg.



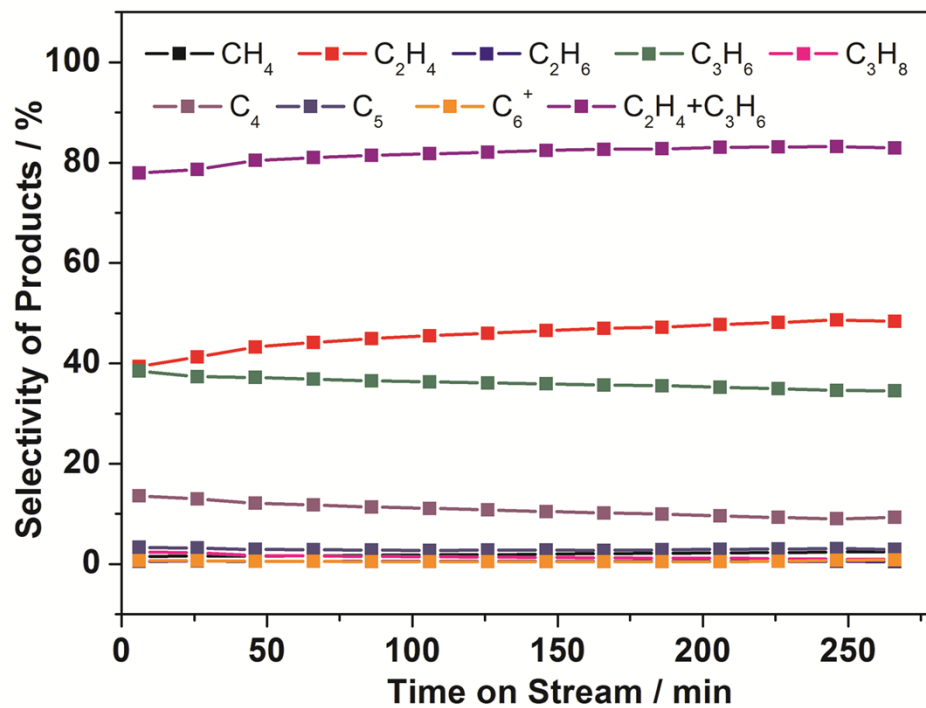

**Figure S8** Products distribution of hierarchically porous SAPO-34 catalyst ( $S_{H4}$ ) in MTO reaction. Experimental conditions: WHSV = 4 h<sup>-1</sup>, T = 723 K, catalyst weight = 300 mg.

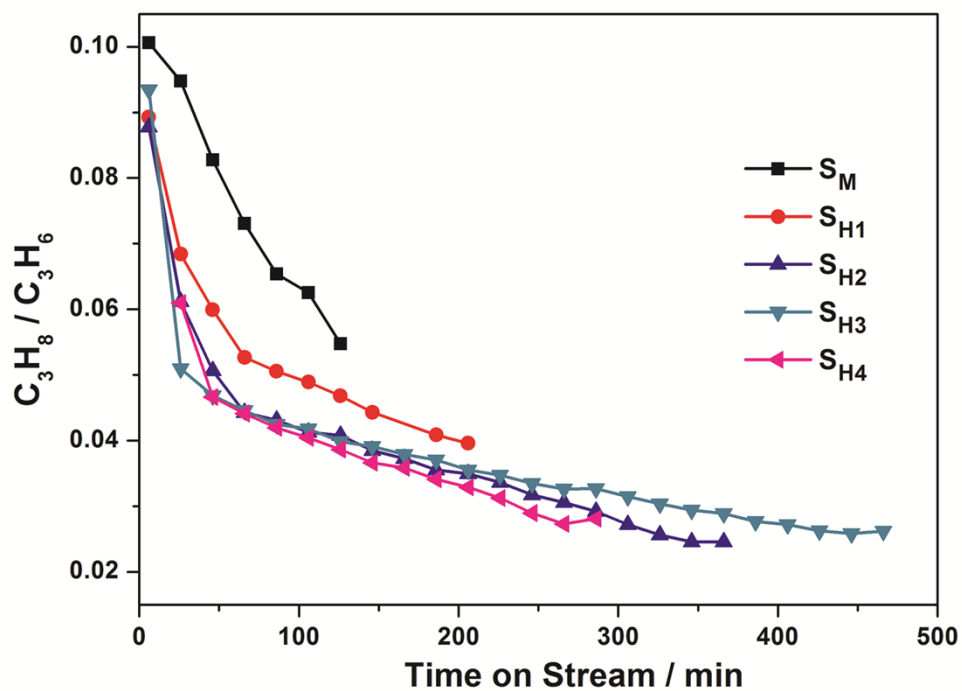

**Figure S9** Hydrogen transfer index (HTI,  $C_3H_8/C_3H_6$ ) values of methanol conversion over conventional microporous SAPO-34 ( $S_M$ ) and hierarchically porous SAPO-34 ( $S_{H1}$ ,  $S_{H2}$ ,  $S_{H3}$ , and  $S_{H4}$ ) catalysts. Experimental conditions: WHSV =  $4 \text{ h}^{-1}$ ,  $T = 723 \text{ K}$ , catalyst weight = 300 mg.

**Table S1** MTO results on conventional microporous SAPO-34 ( $S_M$ ) and hierarchically porous SAPO-34 ( $S_{H1}$ ,  $S_{H2}$ ,  $S_{H3}$ , and  $S_{H4}$ ) catalysts.

| Samples  | TOS<br>(min) | Selectivity (%) |                               |                               |                               |                               |                |                             |                                                          |
|----------|--------------|-----------------|-------------------------------|-------------------------------|-------------------------------|-------------------------------|----------------|-----------------------------|----------------------------------------------------------|
|          |              | CH <sub>4</sub> | C <sub>2</sub> H <sub>4</sub> | C <sub>2</sub> H <sub>6</sub> | C <sub>3</sub> H <sub>6</sub> | C <sub>3</sub> H <sub>8</sub> | C <sub>4</sub> | C <sub>5</sub> <sup>+</sup> | C <sub>2</sub> <sup>=</sup> +C <sub>3</sub> <sup>=</sup> |
| $S_M$    | 6            | 1.4             | 33.9                          | 0.5                           | 41.2                          | 4.2                           | 15.1           | 3.7                         | 75.1                                                     |
|          | 66*          | 1.6             | 41.0                          | 0.7                           | 38.8                          | 2.8                           | 11.4           | 3.7                         | 79.8                                                     |
| $S_{H1}$ | 6            | 1.2             | 36.5                          | 0.5                           | 39.4                          | 3.5                           | 14.4           | 4.5                         | 75.6                                                     |
|          | 186*         | 2.8             | 47.8                          | 0.6                           | 35.1                          | 1.4                           | 8.9            | 4.8                         | 82.9                                                     |
| $S_{H2}$ | 6            | 1.3             | 36.0                          | 0.5                           | 39.6                          | 3.5                           | 14.6           | 5.1                         | 75.6                                                     |
|          | 306*         | 2.7             | 49.3                          | 0.5                           | 34.2                          | 0.9                           | 8.9            | 3.5                         | 83.5                                                     |
| $S_{H3}$ | 6            | 1.0             | 33.1                          | 0.5                           | 41.1                          | 3.8                           | 16.0           | 4.5                         | 74.2                                                     |
|          | 386*         | 2.7             | 51.1                          | 0.5                           | 33.1                          | 0.9                           | 8.4            | 3.3                         | 84.2                                                     |
| $S_{H4}$ | 6            | 1.5             | 39.4                          | 0.5                           | 38.5                          | 2.4                           | 13.6           | 4.1                         | 77.9                                                     |
|          | 226*         | 2.3             | 48.2                          | 0.5                           | 34.9                          | 1.1                           | 9.3            | 3.7                         | 83.1                                                     |

Reaction conditions: WHSV = 4 h<sup>-1</sup>, T = 723K, catalyst weight = 300 mg.

\* Lifetime: the reaction duration with > 99.9% methanol conversion.

**Table S2** The variations of coke formation in methanol conversion over conventional microporous SAPO-34 ( $S_M$ ) and hierarchically porous SAPO-34 ( $S_{H1}$ ,  $S_{H2}$ ,  $S_{H3}$ , and  $S_{H4}$ ) catalysts.

| Catalysts                       | $S_M$ | $S_{H1}$ | $S_{H2}$ | $S_{H3}$ | $S_{H4}$ |
|---------------------------------|-------|----------|----------|----------|----------|
| Coke (% , g/gcat)               | 16.95 | 22.39    | 23.06    | 23.07    | 21.18    |
| TOS (min)                       | 126   | 246      | 366      | 486      | 286      |
| $R_{\text{coke}}$ (mg/min) (1)  | 0.403 | 0.273    | 0.189    | 0.142    | 0.222    |
| $P_{\text{coke}}$ (g/gMeOH) (2) | 0.020 | 0.014    | 0.009    | 0.007    | 0.011    |

(1)  $R_{\text{coke}}$ (mg/min) = coke amount (mg) / reaction time (min);

(2)  $P_{\text{coke}}$ (g/gMeOH) = coke amount (g) / methanol feedstock (g).
